# Supplementary material for: Rate variation in the evolution of non-coding DNA associated with social evolution in bees
Source: bioRxiv preprint, doi:10.1101/461079, version 2 (2019-02-13)
Supplement: Supplementary Tables [file 461079_file04.xlsx]

## Sheet: TableS1
Table S1. Species representation in 3,463 non-overlapping NCARs.
Species	#NCARs present	Fraction NCARs present	#Bases in NCARs	Fraction genome in NCARs	Median divergence from A. mellifera
A. florea	3363	0.971	1253717	0.00548	0.038
A. mellifera	3463	1	1302476	0.00558	0
B. impatiens	3246	0.937	1198401	0.00484	0.12
B. terrestris	3207	0.926	1186809	0.00481	0.12
C. calcarata	2724	0.787	988729	0.00534	0.17
D. novaeangliae	2713	0.783	982098	0.00351	0.17
E. mexicana	3224	0.931	1183478	0.00218	0.11
H. laboriosa	3153	0.91	1159012	0.00398	0.13
L. albipes	2294	0.662	819746	0.00245	0.16
Meg. rotundata	2814	0.813	985316	0.00364	0.16
Mel. quadrifasciata	3103	0.896	1147692	0.00449	0.13

## Sheet: TableS2
Table S2. Distribution of NCARs across the 16 Apis mellifera chromosomes.
Chromosome	#gene-associated NCARs	#gene-associated NCARs/Mb	#intergenic NCARs	#intergenic NCARs/Mb	Chromosome length
Group8	103	8.21	9	0.72	12545575
Group15	91	9.98	7	0.77	9117229
Group9	117	11.07	16	1.16	10570453
Group14	123	12.87	15	1.22	9553655
Group10	175	15.13	19	1.64	11565953
Group11	211	15.32	22	2.08	13776556
Group3	210	17.03	15	2.2	12334341
Group2	249	17.06	23	2.41	14599267
Group7	208	17.23	30	2.49	12069345
Group16	121	17.78	38	2.83	6807165
Group6	297	17.87	39	3.26	16622937
Group4	214	17.88	99	3.56	11968334
Group1	519	18.67	61	3.67	27793408
Group5	252	18.79	74	5.07	13413272
Group12	232	20.9	61	5.5	11100702
Group13	214	22.32	61	6.36	9588499

## Sheet: TableS3
Table S3. GO terms enriched in genes proximal to NCARs present in all 11 bee taxa.
GOID	Uncorrected P-value	Corrected P-value	#genes proximal to NCARs w/ term	GO Term
GO:0007275	1.22304e-06	0.00306738	10	multicellular organism development
GO:0048856	2.79775e-06	0.00701396	10	anatomical structure development
GO:0044707	3.00377e-06	0.00752744	10	single-multicellular organism process
GO:0044767	6.30217e-06	0.0157869	10	single-organism developmental process
GO:0006351	6.6276e-06	0.0165955	21	transcription, DNA-templated
GO:0097659	6.6276e-06	0.0165955	21	nucleic acid-templated transcription
GO:0032774	6.98114e-06	0.0174668	21	RNA biosynthetic process
GO:0032502	7.62202e-06	0.0190627	10	developmental process
GO:0032501	3.48835e-05	0.0872087	10	multicellular organismal process
GO:0034654	3.85307e-05	0.0962883	22	nucleobase-containing compound biosynthetic process
GO:0006355	5.22968e-05	0.130637	15	regulation of transcription, DNA-templated
GO:1903506	5.22968e-05	0.130637	15	regulation of nucleic acid-templated transcription
GO:2001141	5.22968e-05	0.130637	15	regulation of RNA biosynthetic process
GO:0051252	5.71675e-05	0.142633	15	regulation of RNA metabolic process
GO:0019219	7.86276e-05	0.196097	15	regulation of nucleobase-containing compound metabolic process
GO:0019438	0.000105831	0.263837	22	aromatic compound biosynthetic process
GO:0018130	0.000154309	0.384537	22	heterocycle biosynthetic process
GO:1901362	0.000188709	0.470074	22	organic cyclic compound biosynthetic process
GO:0010556	0.000211524	0.526695	15	regulation of macromolecule biosynthetic process
GO:0031326	0.000211524	0.526695	15	regulation of cellular biosynthetic process
GO:2000112	0.000211524	0.526695	15	regulation of cellular macromolecule biosynthetic process
GO:0009889	0.000216904	0.53944	15	regulation of biosynthetic process
GO:0016070	0.000262602	0.652828	25	RNA metabolic process
GO:0010468	0.00047582	1	15	regulation of gene expression
GO:0051171	0.000497747	1	15	regulation of nitrogen compound metabolic process
GO:0080090	0.000509034	1	15	regulation of primary metabolic process
GO:0031323	0.000532272	1	15	regulation of cellular metabolic process
GO:0048731	0.00057355	1	4	system development
GO:0044271	0.000625499	1	26	cellular nitrogen compound biosynthetic process
GO:0010467	0.000724399	1	28	gene expression
GO:0060255	0.0011368	1	15	regulation of macromolecule metabolic process
GO:0034645	0.00127554	1	25	cellular macromolecule biosynthetic process
GO:0009059	0.00132716	1	25	macromolecule biosynthetic process
GO:0019222	0.00141095	1	15	regulation of metabolic process
GO:0090304	0.00270823	1	26	nucleic acid metabolic process
GO:0006139	0.00718082	1	28	nucleobase-containing compound metabolic process
GO:0007166	0.00827048	1	5	cell surface receptor signaling pathway
GO:0009058	0.0101076	1	29	biosynthetic process
GO:0044249	0.0103273	1	28	cellular biosynthetic process
GO:1901576	0.0106187	1	28	organic substance biosynthetic process
GO:0050794	0.0119417	1	25	regulation of cellular process
GO:0006725	0.0141801	1	28	cellular aromatic compound metabolic process
GO:0046483	0.0144322	1	28	heterocycle metabolic process
GO:0050793	0.0159112	1	2	regulation of developmental process
GO:0065007	0.01682	1	26	biological regulation
GO:1901360	0.0176076	1	28	organic cyclic compound metabolic process
GO:0009653	0.0178914	1	2	anatomical structure morphogenesis
GO:0050789	0.019125	1	25	regulation of biological process
GO:0007018	0.0206781	1	4	microtubule-based movement
GO:0048513	0.0244134	1	2	animal organ development
GO:0034641	0.0251098	1	31	cellular nitrogen compound metabolic process
GO:0006928	0.0295498	1	4	movement of cell or subcellular component
GO:0009987	0.0316027	1	57	cellular process
GO:0030154	0.0398456	1	2	cell differentiation
GO:0030030	0.0426991	1	2	cell projection organization
GO:0120036	0.0426991	1	2	plasma membrane bounded cell projection organization
GO:0007017	0.0497842	1	5	microtubule-based process

## Sheet: TableS4
Table S4. Permutation tests of NCAR clustering in 200kb windows.
A. mellifera chromosome	#windows w/ ≥5 NCARs	Prop. perm. w/ ≥5 NCARs	#windows w/ ≥6 NCARs	Prop. perm. w/ ≥6 NCARs	#windows w/ ≥7 NCARs	Prop. perm. w/ ≥7 NCARs	#windows w/ ≥10NCARs	Prop. perm. w/ ≥10 NCARs
Group1	41	0.491	34	0	28	0	15	0
Group2	16	0.699	15	0.001	12	0	6	0
Group3	14	0.601	9	0.154	9	0	7	0
Group4	15	0.723	11	0.078	9	0	5	0
Group5	18	0.842	16	0.007	13	0	6	0
Group6	25	0.051	16	0.003	11	0	7	0
Group7	12	0.844	10	0.045	7	0.008	5	0
Group8	6	0	4	0	1	0.048	0	0
Group9	10	0	7	0	4	0	1	0.006
Group10	12	0.079	10	0	8	0	3	0
Group11	15	0.104	13	0	12	0	5	0
Group12	21	0.611	14	0.209	12	0.001	5	0
Group13	16	0.995	14	0.241	13	0	6	0
Group14	8	0.043	6	0.001	3	0.008	1	0.005
Group15	4	0.057	3	0.011	3	0	3	0
Group16	9	0.546	7	0.065	6	0.003	4	0

## Sheet: TableS5
Table S5. Mean AT-content of NCARs.
Species	NCAR %AT	Genome %AT
A. mellifera	59.5	67.3
A. florea	59.1	66.3
M. quadrifasciata	56.4	61.1
B impatiens	57.5	62.3
B. terrestris	57.6	62.5
C. calcarata	54.4	58.7
E. mexicana	56.6	59.3
H. laboriosa	56.2	60.7
M. rotundata	57.2	63.5
D. novaeangliae	54.9	60.5
L. albipes	53.7	58.5

## Sheet: TableS6
Table S6. GO terms enriched in genes proximal to the 100 fastest- and slowest-evolving NCARs.
NCAR set	GOID	Uncorrected P-value	Corrected P-value	#slow-evolving NCARs w/ term	#slow-evolving NCARs	#total NCARs w/ term	#total NCARs	Prop. fast/slow-evolving NCARs w/ term	Prop. total NCARs w/ term	Fold enrichment	GO term
100 fastest	GO:0006412	2.43e-06	0.00134514	10	89	22	1007	0.1124	0.0218	5.156	translation
100 fastest	GO:0043043	4.02e-06	0.00222093	10	89	23	1007	0.1124	0.0228	4.93	peptide biosynthetic process
100 fastest	GO:0006518	4.2e-06	0.00232472	11	89	28	1007	0.1236	0.0278	4.446	peptide metabolic process
100 fastest	GO:0003735	4.23e-05	0.00554125	6	89	10	1007	0.0674	0.0099	6.808	structural constituent of ribosome
100 fastest	GO:0043604	1.515e-05	0.00837966	10	89	26	1007	0.1124	0.0258	4.357	amide biosynthetic process
100 fastest	GO:0043603	2.682e-05	0.0148338	11	89	33	1007	0.1236	0.0328	3.768	cellular amide metabolic process
100 fastest	GO:0005840	0.00028188	0.0388999	6	89	13	1007	0.0674	0.0129	5.225	ribosome
100 slowest	GO:0005634	0	0	62	84	493	1007	0.7381	0.4896	1.508	nucleus
100 slowest	GO:0003676	0	0	47	84	307	1007	0.5595	0.3049	1.835	nucleic acid binding
100 slowest	GO:0010468	0	0	49	84	328	1007	0.5833	0.3257	1.791	regulation of gene expression
100 slowest	GO:0051252	0	0	45	84	283	1007	0.5357	0.281	1.906	regulation of RNA metabolic process
100 slowest	GO:0019219	0	1e-08	45	84	292	1007	0.5357	0.29	1.847	regulation of nucleobase-containing compound metabolic process
100 slowest	GO:0003677	0	3e-08	35	84	197	1007	0.4167	0.1956	2.13	DNA binding
100 slowest	GO:0060255	0	4e-08	52	84	408	1007	0.619	0.4052	1.528	regulation of macromolecule metabolic process
100 slowest	GO:0043231	0	9e-08	63	84	651	1007	0.75	0.6465	1.16	intracellular membrane-bounded organelle
100 slowest	GO:0006355	0	1.4e-07	40	84	253	1007	0.4762	0.2512	1.896	regulation of transcription, DNA-templated
100 slowest	GO:2001141	0	1.4e-07	40	84	253	1007	0.4762	0.2512	1.896	regulation of RNA biosynthetic process
100 slowest	GO:1903506	0	1.4e-07	40	84	253	1007	0.4762	0.2512	1.896	regulation of nucleic acid-templated transcription
100 slowest	GO:0019222	0	1.8e-07	52	84	422	1007	0.619	0.4191	1.477	regulation of metabolic process
100 slowest	GO:1901363	0	4.3e-07	50	84	416	1007	0.5952	0.4131	1.441	heterocyclic compound binding
100 slowest	GO:0051171	0	5e-07	49	84	385	1007	0.5833	0.3823	1.526	regulation of nitrogen compound metabolic process
100 slowest	GO:0010556	0	6e-07	42	84	289	1007	0.5	0.287	1.742	regulation of macromolecule biosynthetic process
100 slowest	GO:2000112	0	6e-07	42	84	289	1007	0.5	0.287	1.742	regulation of cellular macromolecule biosynthetic process
100 slowest	GO:0097159	1e-08	6.5e-07	50	84	420	1007	0.5952	0.4171	1.427	organic cyclic compound binding
100 slowest	GO:0016070	0	7.3e-07	39	84	253	1007	0.4643	0.2512	1.848	RNA metabolic process
100 slowest	GO:0080090	0	9.6e-07	49	84	391	1007	0.5833	0.3883	1.502	regulation of primary metabolic process
100 slowest	GO:0009889	0	1.11e-06	42	84	294	1007	0.5	0.292	1.712	regulation of biosynthetic process
100 slowest	GO:0031326	0	1.11e-06	42	84	294	1007	0.5	0.292	1.712	regulation of cellular biosynthetic process
100 slowest	GO:0043227	2e-08	1.34e-06	63	84	681	1007	0.75	0.6763	1.109	membrane-bounded organelle
100 slowest	GO:0031323	0	1.64e-06	49	84	396	1007	0.5833	0.3932	1.483	regulation of cellular metabolic process
100 slowest	GO:0090304	3e-08	1.981e-05	39	84	280	1007	0.4643	0.2781	1.67	nucleic acid metabolic process
100 slowest	GO:0010467	6e-08	3.364e-05	38	84	272	1007	0.4524	0.2701	1.675	gene expression
100 slowest	GO:0006139	1.9e-07	0.00011277	39	84	296	1007	0.4643	0.2939	1.58	nucleobase-containing compound metabolic process
100 slowest	GO:0046483	2.6e-07	0.00015371	39	84	299	1007	0.4643	0.2969	1.564	heterocycle metabolic process
100 slowest	GO:0003700	1.73e-06	0.00016823	21	84	111	1007	0.25	0.1102	2.269	transcription factor activity, sequence-specific DNA binding
100 slowest	GO:0001071	1.73e-06	0.00016823	21	84	111	1007	0.25	0.1102	2.269	nucleic acid binding transcription factor activity
100 slowest	GO:0006351	3e-07	0.00017278	29	84	180	1007	0.3452	0.1787	1.932	transcription, DNA-templated
100 slowest	GO:0097659	3e-07	0.00017278	29	84	180	1007	0.3452	0.1787	1.932	nucleic acid-templated transcription
100 slowest	GO:0032774	3e-07	0.00017278	29	84	180	1007	0.3452	0.1787	1.932	RNA biosynthetic process
100 slowest	GO:0043229	2.61e-06	0.00023001	63	84	743	1007	0.75	0.7378	1.017	intracellular organelle
100 slowest	GO:0006725	5.3e-07	0.00031063	39	84	306	1007	0.4643	0.3039	1.528	cellular aromatic compound metabolic process
100 slowest	GO:0043226	6.57e-06	0.00057825	63	84	755	1007	0.75	0.7498	1	organelle
100 slowest	GO:1901360	1.05e-06	0.00061182	39	84	313	1007	0.4643	0.3108	1.494	organic cyclic compound metabolic process
100 slowest	GO:0034654	1.18e-06	0.00068997	29	84	191	1007	0.3452	0.1897	1.82	nucleobase-containing compound biosynthetic process
100 slowest	GO:0018130	1.68e-06	0.00098544	29	84	194	1007	0.3452	0.1927	1.791	heterocycle biosynthetic process
100 slowest	GO:0019438	2.13e-06	0.00124384	29	84	196	1007	0.3452	0.1946	1.774	aromatic compound biosynthetic process
100 slowest	GO:0034641	3.45e-06	0.00201947	39	84	326	1007	0.4643	0.3237	1.434	cellular nitrogen compound metabolic process
100 slowest	GO:1901362	4.18e-06	0.00244694	29	84	202	1007	0.3452	0.2006	1.721	organic cyclic compound biosynthetic process
100 slowest	GO:0009059	7.3e-06	0.00427122	31	84	231	1007	0.369	0.2294	1.609	macromolecule biosynthetic process
100 slowest	GO:0034645	7.3e-06	0.00427122	31	84	231	1007	0.369	0.2294	1.609	cellular macromolecule biosynthetic process
100 slowest	GO:0044271	8.11e-06	0.00474272	30	84	220	1007	0.3571	0.2185	1.634	cellular nitrogen compound biosynthetic process
100 slowest	GO:0065007	9.54e-06	0.00557953	58	84	649	1007	0.6905	0.6445	1.071	biological regulation
100 slowest	GO:0016607	7.087e-05	0.00623633	8	84	24	1007	0.0952	0.0238	4	nuclear speck
100 slowest	GO:0006357	1.097e-05	0.00641675	23	84	144	1007	0.2738	0.143	1.915	regulation of transcription from RNA polymerase II promoter
100 slowest	GO:0050789	1.557e-05	0.0091101	56	84	617	1007	0.6667	0.6127	1.088	regulation of biological process
100 slowest	GO:0050794	2.193e-05	0.0128296	54	84	585	1007	0.6429	0.5809	1.107	regulation of cellular process
100 slowest	GO:0000398	3.427e-05	0.0200451	8	84	22	1007	0.0952	0.0218	4.367	mRNA splicing, via spliceosome
100 slowest	GO:0000377	3.427e-05	0.0200451	8	84	22	1007	0.0952	0.0218	4.367	RNA splicing, via transesterification reactions with bulged adenosine as nucleophile
100 slowest	GO:0000375	3.427e-05	0.0200451	8	84	22	1007	0.0952	0.0218	4.367	RNA splicing, via transesterification reactions
100 slowest	GO:0071011	0.00022936	0.0201838	4	84	6	1007	0.0476	0.006	7.933	precatalytic spliceosome
100 slowest	GO:0000381	4.369e-05	0.0255602	7	84	17	1007	0.0833	0.0169	4.929	regulation of alternative mRNA splicing, via spliceosome
100 slowest	GO:0044260	7.575e-05	0.0443109	43	84	423	1007	0.5119	0.4201	1.219	cellular macromolecule metabolic process

## Sheet: TableS7
Table S7. GO enrichment in clade-specific NCARs.
Focal taxa	GOID	UncorrectedP-value	Corrected P-value	#genes w/ term	#genes	#total genes w/ term	#total genes	Prop. genes w/ term	Prop. total genes w/ term	Fold enrichment	GO term
complex social	GO:0032989	1.542e-05	0.0109926	16	56	93	1007	0.2857	0.0924	3.092	cellular component morphogenesis
complex social	GO:0000902	7.676e-05	0.0547318	14	56	83	1007	0.25	0.0824	3.034	cell morphogenesis
complex social	GO:0005488	0.00028446	0.0290147	51	56	722	1007	0.9107	0.717	1.27	binding
complex social	GO:0048646	0.00047074	0.335636	12	56	75	1007	0.2143	0.0745	2.877	anatomical structure formation involved in morphogenesis
complex social	GO:0048856	0.0004807	0.34274	34	56	389	1007	0.6071	0.3863	1.572	anatomical structure development
complex social	GO:0048872	0.0005097	0.363417	4	56	8	1007	0.0714	0.0079	9.038	homeostasis of number of cells
complex social	GO:0048731	0.00052508	0.374382	28	56	292	1007	0.5	0.29	1.724	system development
complex social	GO:0048468	0.00054006	0.385066	20	56	175	1007	0.3571	0.1738	2.055	cell development
complex social	GO:0009653	0.00069087	0.49259	21	56	192	1007	0.375	0.1907	1.966	anatomical structure morphogenesis
complex social	GO:0006351	0.00079925	0.569862	20	56	180	1007	0.3571	0.1787	1.998	transcription, DNA-templated
complex social	GO:0097659	0.00079925	0.569862	20	56	180	1007	0.3571	0.1787	1.998	nucleic acid-templated transcription
complex social	GO:0032774	0.00079925	0.569862	20	56	180	1007	0.3571	0.1787	1.998	RNA biosynthetic process
complex social	GO:0032502	0.00084201	0.600353	34	56	399	1007	0.6071	0.3962	1.532	developmental process
complex social	GO:0120039	0.0009937	0.708508	11	56	70	1007	0.1964	0.0695	2.826	plasma membrane bounded cell projection morphogenesis
complex social	GO:0048812	0.0009937	0.708508	11	56	70	1007	0.1964	0.0695	2.826	neuron projection morphogenesis
complex social	GO:0000904	0.00112558	0.802541	11	56	71	1007	0.1964	0.0705	2.786	cell morphogenesis involved in differentiation
complex social	GO:0007275	0.0011793	0.840843	32	56	371	1007	0.5714	0.3684	1.551	multicellular organism development
complex social	GO:0003705	0.00121372	0.1238	5	56	16	1007	0.0893	0.0159	5.616	transcription factor activity, RNA polymerase II distal enhancer sequence-specific binding
complex social	GO:0048858	0.00127171	0.906728	11	56	72	1007	0.1964	0.0715	2.747	cell projection morphogenesis
complex social	GO:0032501	0.00139448	0.994263	35	56	426	1007	0.625	0.423	1.478	multicellular organismal process
complex social	GO:0007613	0.00140545	1	4	56	10	1007	0.0714	0.0099	7.212	memory
complex social	GO:1901362	0.00141687	1	21	56	202	1007	0.375	0.2006	1.869	organic cyclic compound biosynthetic process
complex social	GO:0032990	0.00143323	1	11	56	73	1007	0.1964	0.0725	2.709	cell part morphogenesis
complex social	GO:0007423	0.00170777	1	12	56	86	1007	0.2143	0.0854	2.509	sensory organ development
complex social	GO:0030182	0.00173886	1	15	56	123	1007	0.2679	0.1221	2.194	neuron differentiation
complex social	GO:0034654	0.00177829	1	20	56	191	1007	0.3571	0.1897	1.882	nucleobase-containing compound biosynthetic process
complex social	GO:0018130	0.00218106	1	20	56	194	1007	0.3571	0.1927	1.853	heterocycle biosynthetic process
complex social	GO:0048513	0.0024082	1	21	56	210	1007	0.375	0.2085	1.799	animal organ development
complex social	GO:0019438	0.00249124	1	20	56	196	1007	0.3571	0.1946	1.835	aromatic compound biosynthetic process
complex social	GO:0001654	0.00262526	1	10	56	67	1007	0.1786	0.0665	2.686	eye development
complex social	GO:0048667	0.00262526	1	10	56	67	1007	0.1786	0.0665	2.686	cell morphogenesis involved in neuron differentiation
complex social	GO:0050954	0.00289504	1	3	56	6	1007	0.0536	0.006	8.933	sensory perception of mechanical stimulus
complex social	GO:0007293	0.00289504	1	3	56	6	1007	0.0536	0.006	8.933	germarium-derived egg chamber formation
complex social	GO:0071364	0.00304035	1	2	56	2	1007	0.0357	0.002	17.85	cellular response to epidermal growth factor stimulus
complex social	GO:0045776	0.00304035	1	2	56	2	1007	0.0357	0.002	17.85	negative regulation of blood pressure
complex social	GO:0008217	0.00304035	1	2	56	2	1007	0.0357	0.002	17.85	regulation of blood pressure
complex social	GO:0097755	0.00304035	1	2	56	2	1007	0.0357	0.002	17.85	positive regulation of blood vessel diameter
complex social	GO:0003073	0.00304035	1	2	56	2	1007	0.0357	0.002	17.85	regulation of systemic arterial blood pressure
complex social	GO:0033629	0.00304035	1	2	56	2	1007	0.0357	0.002	17.85	negative regulation of cell adhesion mediated by integrin
complex social	GO:0033628	0.00304035	1	2	56	2	1007	0.0357	0.002	17.85	regulation of cell adhesion mediated by integrin
complex social	GO:0003085	0.00304035	1	2	56	2	1007	0.0357	0.002	17.85	negative regulation of systemic arterial blood pressure
complex social	GO:0070142	0.00304035	1	2	56	2	1007	0.0357	0.002	17.85	synaptic vesicle budding
complex social	GO:0001223	0.00304035	0.310115	2	56	2	1007	0.0357	0.002	17.85	transcription coactivator binding
complex social	GO:0048869	0.00329596	1	25	56	276	1007	0.4464	0.2741	1.629	cellular developmental process
complex social	GO:0001738	0.00362644	1	5	56	20	1007	0.0893	0.0199	4.487	morphogenesis of a polarized epithelium
complex social	GO:0031175	0.00461749	1	11	56	84	1007	0.1964	0.0834	2.355	neuron projection development
complex social	GO:0051239	0.00468562	1	16	56	149	1007	0.2857	0.148	1.93	regulation of multicellular organismal process
complex social	GO:0098609	0.00565232	1	5	56	22	1007	0.0893	0.0218	4.096	cell-cell adhesion
complex social	GO:2000027	0.00565232	1	5	56	22	1007	0.0893	0.0218	4.096	regulation of organ morphogenesis
complex social	GO:0022407	0.00566292	1	4	56	14	1007	0.0714	0.0139	5.137	regulation of cell-cell adhesion
complex social	GO:0001736	0.00566292	1	4	56	14	1007	0.0714	0.0139	5.137	establishment of planar polarity
complex social	GO:0043010	0.00566292	1	4	56	14	1007	0.0714	0.0139	5.137	camera-type eye development
complex social	GO:0007164	0.00566292	1	4	56	14	1007	0.0714	0.0139	5.137	establishment of tissue polarity
complex social	GO:0003677	0.00656815	0.669951	19	56	197	1007	0.3393	0.1956	1.735	DNA binding
complex social	GO:0051674	0.00663845	1	9	56	64	1007	0.1607	0.0636	2.527	localization of cell
complex social	GO:0048870	0.00663845	1	9	56	64	1007	0.1607	0.0636	2.527	cell motility
complex social	GO:0043254	0.00691893	1	5	56	23	1007	0.0893	0.0228	3.917	regulation of protein complex assembly
complex social	GO:0001664	0.00748128	0.763091	3	56	8	1007	0.0536	0.0079	6.785	G-protein coupled receptor binding
complex social	GO:0048666	0.00748979	1	12	56	102	1007	0.2143	0.1013	2.115	neuron development
complex social	GO:0002682	0.00775263	1	6	56	33	1007	0.1071	0.0328	3.265	regulation of immune system process
complex social	GO:0070849	0.00879432	1	2	56	3	1007	0.0357	0.003	11.9	response to epidermal growth factor
complex social	GO:0050880	0.00879432	1	2	56	3	1007	0.0357	0.003	11.9	regulation of blood vessel size
complex social	GO:0003018	0.00879432	1	2	56	3	1007	0.0357	0.003	11.9	vascular process in circulatory system
complex social	GO:0005796	0.00879432	0.905815	2	56	3	1007	0.0357	0.003	11.9	Golgi lumen
complex social	GO:1900087	0.00879432	1	2	56	3	1007	0.0357	0.003	11.9	positive regulation of G1/S transition of mitotic cell cycle
complex social	GO:0001221	0.00879432	0.897021	2	56	3	1007	0.0357	0.003	11.9	transcription cofactor binding
complex social	GO:0035296	0.00879432	1	2	56	3	1007	0.0357	0.003	11.9	regulation of tube diameter
complex social	GO:0097746	0.00879432	1	2	56	3	1007	0.0357	0.003	11.9	regulation of blood vessel diameter
complex social	GO:1902808	0.00879432	1	2	56	3	1007	0.0357	0.003	11.9	positive regulation of cell cycle G1/S phase transition
complex social	GO:0048469	0.00946924	1	4	56	16	1007	0.0714	0.0159	4.491	cell maturation
complex social	GO:0007409	0.00961614	1	8	56	56	1007	0.1429	0.0556	2.57	axonogenesis
complex social	GO:0007411	0.00973429	1	7	56	45	1007	0.125	0.0447	2.796	axon guidance
obligate social	GO:0048869	0.0001224	0.1213	43	97	276	1007	0.4433	0.2741	1.617	cellular developmental process
obligate social	GO:0030154	0.00016374	0.162264	42	97	270	1007	0.433	0.2681	1.615	cell differentiation
obligate social	GO:0072001	0.00038698	0.383495	9	97	26	1007	0.0928	0.0258	3.597	renal system development
obligate social	GO:0048731	0.00051958	0.514906	43	97	292	1007	0.4433	0.29	1.529	system development
obligate social	GO:0001655	0.00053447	0.529662	9	97	27	1007	0.0928	0.0268	3.463	urogenital system development
obligate social	GO:0044089	0.00072525	0.718723	9	97	28	1007	0.0928	0.0278	3.338	positive regulation of cellular component biogenesis
obligate social	GO:0045168	0.00086891	0.861086	3	97	3	1007	0.0309	0.003	10.3	cell-cell signaling involved in cell fate commitment
obligate social	GO:0032501	0.00094303	0.934541	56	97	426	1007	0.5773	0.423	1.365	multicellular organismal process
obligate social	GO:0009952	0.00096833	0.959615	9	97	29	1007	0.0928	0.0288	3.222	anterior/posterior pattern specification
obligate social	GO:0007399	0.0012159	1	32	97	203	1007	0.3299	0.2016	1.636	nervous system development
obligate social	GO:0010647	0.00131809	1	17	97	83	1007	0.1753	0.0824	2.127	positive regulation of cell communication
obligate social	GO:0023056	0.00131809	1	17	97	83	1007	0.1753	0.0824	2.127	positive regulation of signaling
obligate social	GO:0060541	0.00158142	1	11	97	43	1007	0.1134	0.0427	2.656	respiratory system development
obligate social	GO:0001822	0.00167524	1	6	97	15	1007	0.0619	0.0149	4.154	kidney development
obligate social	GO:0008406	0.00247348	1	6	97	16	1007	0.0619	0.0159	3.893	gonad development
obligate social	GO:0048699	0.0027282	1	25	97	152	1007	0.2577	0.1509	1.708	generation of neurons
obligate social	GO:0008584	0.00323157	1	3	97	4	1007	0.0309	0.004	7.725	male gonad development
obligate social	GO:0046546	0.00323157	1	3	97	4	1007	0.0309	0.004	7.725	development of primary male sexual characteristics
obligate social	GO:0035161	0.00323157	1	3	97	4	1007	0.0309	0.004	7.725	imaginal disc lineage restriction
obligate social	GO:0007448	0.00323157	1	3	97	4	1007	0.0309	0.004	7.725	anterior/posterior pattern specification, imaginal disc
obligate social	GO:0035295	0.00352136	1	18	97	98	1007	0.1856	0.0973	1.908	tube development
obligate social	GO:0045137	0.00352793	1	6	97	17	1007	0.0619	0.0169	3.663	development of primary sexual characteristics
obligate social	GO:0040011	0.00396181	1	18	97	99	1007	0.1856	0.0983	1.888	locomotion
obligate social	GO:0004871	0.00417199	0.634143	13	97	62	1007	0.134	0.0616	2.175	signal transducer activity
obligate social	GO:0051965	0.00418902	1	4	97	8	1007	0.0412	0.0079	5.215	positive regulation of synapse assembly
obligate social	GO:0009967	0.00441667	1	15	97	77	1007	0.1546	0.0765	2.021	positive regulation of signal transduction
obligate social	GO:0048856	0.00451612	1	50	97	389	1007	0.5155	0.3863	1.334	anatomical structure development
obligate social	GO:0032502	0.00452178	1	51	97	399	1007	0.5258	0.3962	1.327	developmental process
obligate social	GO:0038023	0.00463748	0.704897	10	97	42	1007	0.1031	0.0417	2.472	signaling receptor activity
obligate social	GO:0048584	0.00487304	1	17	97	93	1007	0.1753	0.0924	1.897	positive regulation of response to stimulus
obligate social	GO:0007275	0.00506525	1	48	97	371	1007	0.4948	0.3684	1.343	multicellular organism development
obligate social	GO:0003007	0.00515474	1	5	97	13	1007	0.0515	0.0129	3.992	heart morphogenesis
obligate social	GO:0048729	0.00530056	1	16	97	86	1007	0.1649	0.0854	1.931	tissue morphogenesis
obligate social	GO:0010646	0.00592303	1	26	97	169	1007	0.268	0.1678	1.597	regulation of cell communication
obligate social	GO:0048583	0.00608877	1	27	97	178	1007	0.2784	0.1768	1.575	regulation of response to stimulus
obligate social	GO:0023051	0.00644389	1	26	97	170	1007	0.268	0.1688	1.588	regulation of signaling
obligate social	GO:0007447	0.00658985	1	6	97	19	1007	0.0619	0.0189	3.275	imaginal disc pattern formation
obligate social	GO:0004872	0.00662908	1	10	97	44	1007	0.1031	0.0437	2.359	receptor activity
obligate social	GO:0004888	0.00697062	1	7	97	25	1007	0.0722	0.0248	2.911	transmembrane signaling receptor activity
obligate social	GO:0030323	0.0069868	1	4	97	9	1007	0.0412	0.0089	4.629	respiratory tube development
obligate social	GO:0030324	0.0069868	1	4	97	9	1007	0.0412	0.0089	4.629	lung development
obligate social	GO:0022008	0.00739251	1	25	97	163	1007	0.2577	0.1619	1.592	neurogenesis
obligate social	GO:0007449	0.00751405	1	3	97	5	1007	0.0309	0.005	6.18	proximal/distal pattern formation, imaginal disc
obligate social	GO:0032355	0.00751405	1	3	97	5	1007	0.0309	0.005	6.18	response to estradiol
obligate social	GO:0035282	0.00899357	1	9	97	39	1007	0.0928	0.0387	2.398	segmentation
obligate social	GO:0035217	0.00919212	1	2	97	2	1007	0.0206	0.002	10.3	labial disc development
obligate social	GO:2000369	0.00919212	1	2	97	2	1007	0.0206	0.002	10.3	regulation of clathrin-dependent endocytosis
obligate social	GO:0001223	0.00919212	1	2	97	2	1007	0.0206	0.002	10.3	transcription coactivator binding
obligate social	GO:0032228	0.00919212	1	2	97	2	1007	0.0206	0.002	10.3	regulation of synaptic transmission, GABAergic
obligate social	GO:0030203	0.00919212	1	2	97	2	1007	0.0206	0.002	10.3	glycosaminoglycan metabolic process
obligate social	GO:1900242	0.00919212	1	2	97	2	1007	0.0206	0.002	10.3	regulation of synaptic vesicle endocytosis
obligate social	GO:1900244	0.00919212	1	2	97	2	1007	0.0206	0.002	10.3	positive regulation of synaptic vesicle endocytosis
obligate social	GO:0030720	0.00919212	1	2	97	2	1007	0.0206	0.002	10.3	oocyte localization involved in germarium-derived egg chamber formation
obligate social	GO:0042478	0.00919212	1	2	97	2	1007	0.0206	0.002	10.3	regulation of eye photoreceptor cell development
obligate social	GO:0051968	0.00919212	1	2	97	2	1007	0.0206	0.002	10.3	positive regulation of synaptic transmission, glutamatergic
obligate social	GO:0051540	0.00919212	1	2	97	2	1007	0.0206	0.002	10.3	metal cluster binding
obligate social	GO:0002385	0.00919212	1	2	97	2	1007	0.0206	0.002	10.3	mucosal immune response
obligate social	GO:0035155	0.00919212	1	2	97	2	1007	0.0206	0.002	10.3	negative regulation of terminal cell fate specification, open tracheal system
obligate social	GO:0021952	0.00919212	1	2	97	2	1007	0.0206	0.002	10.3	central nervous system projection neuron axonogenesis
obligate social	GO:2000370	0.00919212	1	2	97	2	1007	0.0206	0.002	10.3	positive regulation of clathrin-dependent endocytosis
obligate social	GO:0048735	0.00919212	1	2	97	2	1007	0.0206	0.002	10.3	haltere morphogenesis
obligate social	GO:0005797	0.00919212	1	2	97	2	1007	0.0206	0.002	10.3	Golgi medial cisterna
obligate social	GO:0007481	0.00919212	1	2	97	2	1007	0.0206	0.002	10.3	haltere disc morphogenesis
obligate social	GO:0051536	0.00919212	1	2	97	2	1007	0.0206	0.002	10.3	iron-sulfur cluster binding
obligate social	GO:0051539	0.00919212	1	2	97	2	1007	0.0206	0.002	10.3	4 iron, 4 sulfur cluster binding
obligate social	GO:1903423	0.00919212	1	2	97	2	1007	0.0206	0.002	10.3	positive regulation of synaptic vesicle recycling
obligate social	GO:0090239	0.00919212	1	2	97	2	1007	0.0206	0.002	10.3	regulation of histone H4 acetylation
obligate social	GO:0046677	0.00919212	1	2	97	2	1007	0.0206	0.002	10.3	response to antibiotic
obligate social	GO:0008354	0.00919212	1	2	97	2	1007	0.0206	0.002	10.3	germ cell migration
obligate social	GO:0021960	0.00919212	1	2	97	2	1007	0.0206	0.002	10.3	anterior commissure morphogenesis
obligate social	GO:0046331	0.00919212	1	2	97	2	1007	0.0206	0.002	10.3	lateral inhibition
obligate social	GO:0003208	0.00919212	1	2	97	2	1007	0.0206	0.002	10.3	cardiac ventricle morphogenesis
obligate social	GO:0003206	0.00919212	1	2	97	2	1007	0.0206	0.002	10.3	cardiac chamber morphogenesis
obligate social	GO:0035224	0.00919212	1	2	97	2	1007	0.0206	0.002	10.3	genital disc anterior/posterior pattern formation
obligate social	GO:0035221	0.00919212	1	2	97	2	1007	0.0206	0.002	10.3	genital disc pattern formation
obligate social	GO:0009897	0.00919212	1	2	97	2	1007	0.0206	0.002	10.3	external side of plasma membrane
obligate social	GO:0002251	0.00919212	1	2	97	2	1007	0.0206	0.002	10.3	organ or tissue specific immune response
obligate social	GO:0007129	0.00919212	1	2	97	2	1007	0.0206	0.002	10.3	synapsis
obligate social	GO:0048844	0.00919212	1	2	97	2	1007	0.0206	0.002	10.3	artery morphogenesis
obligate social	GO:0045314	0.00919212	1	2	97	2	1007	0.0206	0.002	10.3	regulation of compound eye photoreceptor development
obligate social	GO:1902805	0.00919212	1	2	97	2	1007	0.0206	0.002	10.3	positive regulation of synaptic vesicle transport
obligate social	GO:0006013	0.00919212	1	2	97	2	1007	0.0206	0.002	10.3	mannose metabolic process
obligate social	GO:0090240	0.00919212	1	2	97	2	1007	0.0206	0.002	10.3	positive regulation of histone H4 acetylation
obligate social	GO:2000274	0.00919212	1	2	97	2	1007	0.0206	0.002	10.3	regulation of epithelial cell migration, open tracheal system
Corbiculates	GO:0060076	0.00165507	0.283017	3	120	3	1007	0.025	0.003	8.333	excitatory synapse
Corbiculates	GO:0001941	0.00165507	1	3	120	3	1007	0.025	0.003	8.333	postsynaptic membrane organization
Corbiculates	GO:0005102	0.00167084	0.274018	13	120	46	1007	0.1083	0.0457	2.37	receptor binding
Corbiculates	GO:0048869	0.00192411	1	47	120	276	1007	0.3917	0.2741	1.429	cellular developmental process
Corbiculates	GO:0003008	0.00208103	1	17	120	70	1007	0.1417	0.0695	2.039	system process
Corbiculates	GO:0030154	0.00220009	1	46	120	270	1007	0.3833	0.2681	1.43	cell differentiation
Corbiculates	GO:0005488	0.00266654	0.437312	99	120	722	1007	0.825	0.717	1.151	binding
Corbiculates	GO:0030182	0.00288976	1	25	120	123	1007	0.2083	0.1221	1.706	neuron differentiation
Corbiculates	GO:0050877	0.00397297	1	14	120	56	1007	0.1167	0.0556	2.099	nervous system process
Corbiculates	GO:0022008	0.00536765	1	30	120	163	1007	0.25	0.1619	1.544	neurogenesis
Corbiculates	GO:0005996	0.00604167	1	3	120	4	1007	0.025	0.004	6.25	monosaccharide metabolic process
Corbiculates	GO:0097110	0.00604167	0.990834	3	120	4	1007	0.025	0.004	6.25	scaffold protein binding
Corbiculates	GO:0010771	0.00604167	1	3	120	4	1007	0.025	0.004	6.25	negative regulation of cell morphogenesis involved in differentiation
Corbiculates	GO:0007416	0.00604167	1	3	120	4	1007	0.025	0.004	6.25	synapse assembly
Corbiculates	GO:0048731	0.00695827	1	47	120	292	1007	0.3917	0.29	1.351	system development
Corbiculates	GO:0030030	0.00713166	1	21	120	104	1007	0.175	0.1033	1.694	cell projection organization
Corbiculates	GO:0007399	0.00774201	1	35	120	203	1007	0.2917	0.2016	1.447	nervous system development
Corbiculates	GO:0061061	0.00913413	1	12	120	49	1007	0.1	0.0487	2.053	muscle structure development
Corbiculates	GO:0008306	0.00917577	1	4	120	8	1007	0.0333	0.0079	4.215	associative learning
Corbiculates	GO:0030667	0.00917577	1	4	120	8	1007	0.0333	0.0079	4.215	secretory granule membrane
Corbiculates	GO:0042048	0.00917577	1	4	120	8	1007	0.0333	0.0079	4.215	olfactory behavior
Ceratina	GO:0098609	7.879e-05	0.041205	7	54	22	1007	0.1296	0.0218	5.945	cell-cell adhesion
Ceratina	GO:0007155	0.00027828	0.145542	10	54	53	1007	0.1852	0.0526	3.521	cell adhesion
Ceratina	GO:0022610	0.00032753	0.171296	10	54	54	1007	0.1852	0.0536	3.455	biological adhesion
Ceratina	GO:0098742	0.00034168	0.178697	5	54	13	1007	0.0926	0.0129	7.178	cell-cell adhesion via plasma-membrane adhesion molecules
Ceratina	GO:0071944	0.00080851	0.0905526	21	54	202	1007	0.3889	0.2006	1.939	cell periphery
Ceratina	GO:0005886	0.00120681	0.135162	20	54	193	1007	0.3704	0.1917	1.932	plasma membrane
Ceratina	GO:0007298	0.00139191	0.727969	5	54	17	1007	0.0926	0.0169	5.479	border follicle cell migration
Ceratina	GO:0007297	0.00184914	0.967101	5	54	18	1007	0.0926	0.0179	5.173	ovarian follicle cell migration
Ceratina	GO:0098917	0.00282515	1	2	54	2	1007	0.037	0.002	18.5	retrograde trans-synaptic signaling
Ceratina	GO:0090239	0.00282515	1	2	54	2	1007	0.037	0.002	18.5	regulation of histone H4 acetylation
Ceratina	GO:0090240	0.00282515	1	2	54	2	1007	0.037	0.002	18.5	positive regulation of histone H4 acetylation
Ceratina	GO:0007160	0.00438193	1	3	54	7	1007	0.0556	0.007	7.943	cell-matrix adhesion
Ceratina	GO:0051052	0.00649221	1	4	54	15	1007	0.0741	0.0149	4.973	regulation of DNA metabolic process
Ceratina	GO:0007156	0.00674601	1	3	54	8	1007	0.0556	0.0079	7.038	homophilic cell adhesion via plasma membrane adhesion molecules
Ceratina	GO:0031589	0.00674601	1	3	54	8	1007	0.0556	0.0079	7.038	cell-substrate adhesion
Ceratina	GO:0048856	0.00712323	1	30	54	389	1007	0.5556	0.3863	1.438	anatomical structure development
Ceratina	GO:0090130	0.00716016	1	5	54	24	1007	0.0926	0.0238	3.891	tissue migration
Ceratina	GO:0090132	0.00716016	1	5	54	24	1007	0.0926	0.0238	3.891	epithelium migration
Ceratina	GO:0010631	0.00716016	1	5	54	24	1007	0.0926	0.0238	3.891	epithelial cell migration
Ceratina	GO:0035309	0.00818311	1	2	54	3	1007	0.037	0.003	12.333	wing and notum subfield formation
Ceratina	GO:0031058	0.0097372	1	3	54	9	1007	0.0556	0.0089	6.247	positive regulation of histone modification
Habropoda	GO:0007422	0.00039608	0.320029	7	107	15	1007	0.0654	0.0149	4.389	peripheral nervous system development
Habropoda	GO:0048856	0.00082351	0.665398	57	107	389	1007	0.5327	0.3863	1.379	anatomical structure development
Habropoda	GO:0032502	0.00088806	0.717549	58	107	399	1007	0.5421	0.3962	1.368	developmental process
Habropoda	GO:0003677	0.00215141	0.342074	33	107	197	1007	0.3084	0.1956	1.577	DNA binding
Habropoda	GO:0007447	0.0021564	1	7	107	19	1007	0.0654	0.0189	3.46	imaginal disc pattern formation
Habropoda	GO:0035216	0.00431542	1	3	107	4	1007	0.028	0.004	7	haltere disc development
Habropoda	GO:0007380	0.00431542	1	3	107	4	1007	0.028	0.004	7	specification of segmental identity, head
Habropoda	GO:0007482	0.00431542	1	3	107	4	1007	0.028	0.004	7	haltere development
Habropoda	GO:0007275	0.00570129	1	52	107	371	1007	0.486	0.3684	1.319	multicellular organism development
Habropoda	GO:0035107	0.00629931	1	11	107	46	1007	0.1028	0.0457	2.249	appendage morphogenesis
Habropoda	GO:0007517	0.00730634	1	7	107	23	1007	0.0654	0.0228	2.868	muscle organ development
Habropoda	GO:0035114	0.00791688	1	10	107	41	1007	0.0935	0.0407	2.297	imaginal disc-derived appendage morphogenesis
Habropoda	GO:0048736	0.00886654	1	11	107	48	1007	0.1028	0.0477	2.155	appendage development
Habropoda	GO:0048737	0.00947607	1	10	107	42	1007	0.0935	0.0417	2.242	imaginal disc-derived appendage development
Habropoda	GO:0008201	0.00995444	1	3	107	5	1007	0.028	0.005	5.6	heparin binding
Habropoda	GO:0007379	0.00995444	1	3	107	5	1007	0.028	0.005	5.6	segment specification
Habropoda	GO:0007449	0.00995444	1	3	107	5	1007	0.028	0.005	5.6	proximal/distal pattern formation, imaginal disc
Habropoda	GO:0008266	0.00995444	1	3	107	5	1007	0.028	0.005	5.6	poly(U) RNA binding
Megachile	GO:0032435	0.0021857	1	3	85	4	1007	0.0353	0.004	8.825	negative regulation of proteasomal ubiquitin-dependent protein catabolic process
Megachile	GO:0030011	0.0021857	1	3	85	4	1007	0.0353	0.004	8.825	maintenance of cell polarity
Megachile	GO:1903363	0.0021857	1	3	85	4	1007	0.0353	0.004	8.825	negative regulation of cellular protein catabolic process
Megachile	GO:0042177	0.0021857	1	3	85	4	1007	0.0353	0.004	8.825	negative regulation of protein catabolic process
Megachile	GO:1903051	0.0021857	1	3	85	4	1007	0.0353	0.004	8.825	negative regulation of proteolysis involved in cellular protein catabolic process
Megachile	GO:1901799	0.0021857	1	3	85	4	1007	0.0353	0.004	8.825	negative regulation of proteasomal protein catabolic process
Megachile	GO:0045861	0.00254986	1	4	85	8	1007	0.0471	0.0079	5.962	negative regulation of proteolysis
Megachile	GO:0001077	0.00414978	0.497973	5	85	14	1007	0.0588	0.0139	4.23	transcriptional activator activity, RNA polymerase II core promoter proximal region sequence-specific binding
Megachile	GO:0021987	0.00513073	1	3	85	5	1007	0.0353	0.005	7.06	cerebral cortex development
Megachile	GO:0008266	0.00513073	0.615688	3	85	5	1007	0.0353	0.005	7.06	poly(U) RNA binding
Megachile	GO:0051298	0.00513073	1	3	85	5	1007	0.0353	0.005	7.06	centrosome duplication
Megachile	GO:0003727	0.00670206	0.804247	4	85	10	1007	0.0471	0.0099	4.758	single-stranded RNA binding
Megachile	GO:0021978	0.00704808	1	2	85	2	1007	0.0235	0.002	11.75	telencephalon regionalization
Megachile	GO:0098773	0.00704808	1	2	85	2	1007	0.0235	0.002	11.75	skin epidermis development
Megachile	GO:0042772	0.00704808	1	2	85	2	1007	0.0235	0.002	11.75	DNA damage response, signal transduction resulting in transcription
Megachile	GO:0043588	0.00704808	1	2	85	2	1007	0.0235	0.002	11.75	skin development
Megachile	GO:0001942	0.00704808	1	2	85	2	1007	0.0235	0.002	11.75	hair follicle development
Megachile	GO:0042633	0.00704808	1	2	85	2	1007	0.0235	0.002	11.75	hair cycle
Megachile	GO:0006978	0.00704808	1	2	85	2	1007	0.0235	0.002	11.75	DNA damage response, signal transduction by p53 class mediator resulting in transcription of p21 class mediator
Megachile	GO:0035090	0.00704808	1	2	85	2	1007	0.0235	0.002	11.75	maintenance of apical/basal cell polarity
Megachile	GO:0022405	0.00704808	1	2	85	2	1007	0.0235	0.002	11.75	hair cycle process
Megachile	GO:0008187	0.00963743	1	3	85	6	1007	0.0353	0.006	5.883	poly-pyrimidine tract binding
When a single genus is given as the focal taxon, this indicates that the NCARs are present only in this genus and the sister clade to this genus.

## Sheet: TableS8
Table S8. Sequence features of NCARs identified as associated with the evolution of eusociality by the relative rates test.
Focal taxa	Feature type	#not significant	Proportion	#significantly slower	Proportion	Enrichment p-value	#significantly faster	Proportion	Enrichment p-value
complex eusocial (A. mellifera, A. florea, M. quadrifasciata)
	3’-UTR	425	0.11	47	0.2	3.2e-05	2	0.01	1
	5’-UTR	195	0.05	22	0.09	0.0038	0	0	1
	intron	1248	0.33	63	0.27	0.97	77	0.32	0.51
	promoter	447	0.12	38	0.16	0.019	8	0.03	1
	downstream	634	0.17	41	0.17	0.38	29	0.12	0.97
	upstream	250	0.07	15	0.06	0.59	33	0.14	8.9e-05
	intergenic	611	0.16	11	0.05	6.3e-09	91	0.38	2.4e-16
	Total	3810		237			240
any eusociality (C. calcarata, L. albipes, obligate eusocial)
	3’-UTR	498	0.11	7	0.07	0.84	7	0.07	0.88
	5’-UTR	234	0.05	6	0.06	0.38	3	0.03	0.79
	intron	1432	0.33	29	0.31	0.58	26	0.26	0.9
	promoter	496	0.11	10	0.11	0.46	26	0.26	4.5e-05
	downstream	724	0.16	17	0.18	0.38	13	0.13	0.79
	upstream	297	0.07	9	0.1	0.19	7	0.07	0.53
	intergenic	707	0.16	16	0.17	0.45	18	0.18	0.35
	Total	4388		94			100
Enrichment p-values are from hypergeometric tests of over- or under-enrichment of sequence feature types.

## Sheet: TableS9
Table S9. GO enrichment in genes proximal to NCARs associated with sociality using RER tests.
Focal taxa	Rate change	GOID	Uncorrected P-value	Corrected P-value	#genes w/ term	#genes	#total genes w/ term	#total genes	Prop. genes w/ term	Prop. total genes w/ term	Fold enrichment	GO term
complex social	faster	GO:0045165	2.292e-05	0.0154032	12	55	55	968	0.2182	0.0568	3.842	cell fate commitment
complex social	faster	GO:0048592	2.626e-05	0.0176494	11	55	47	968	0.2	0.0486	4.115	eye morphogenesis
complex social	faster	GO:0001745	2.733e-05	0.0183656	10	55	39	968	0.1818	0.0403	4.511	compound eye morphogenesis
complex social	faster	GO:0030182	4.285e-05	0.028793	18	55	121	968	0.3273	0.125	2.618	neuron differentiation
complex social	faster	GO:0000122	4.935e-05	0.0331647	11	55	50	968	0.2	0.0517	3.868	negative regulation of transcription from RNA polymerase II promoter
complex social	faster	GO:0048663	5.415e-05	0.0363858	6	55	14	968	0.1091	0.0145	7.524	neuron fate commitment
complex social	faster	GO:0090596	6.021e-05	0.0404602	11	55	51	968	0.2	0.0527	3.795	sensory organ morphogenesis
complex social	faster	GO:0009653	6.859e-05	0.0460943	23	55	188	968	0.4182	0.1942	2.153	anatomical structure morphogenesis
complex social	faster	GO:0000902	7.178e-05	0.048235	14	55	81	968	0.2545	0.0837	3.041	cell morphogenesis
complex social	faster	GO:0032989	7.621e-05	0.0512145	15	55	92	968	0.2727	0.095	2.871	cellular component morphogenesis
complex social	faster	GO:0048749	8.544e-05	0.0574134	10	55	44	968	0.1818	0.0455	3.996	compound eye development
complex social	faster	GO:0007423	9.551e-05	0.0641832	14	55	83	968	0.2545	0.0857	2.97	sensory organ development
complex social	faster	GO:0048645	0.00010027	0.0673796	5	55	10	968	0.0909	0.0103	8.825	animal organ formation
complex social	faster	GO:0046530	0.00011019	0.0740448	8	55	29	968	0.1455	0.03	4.85	photoreceptor cell differentiation
complex social	faster	GO:0001654	0.0001157	0.0777477	12	55	64	968	0.2182	0.0661	3.301	eye development
complex social	faster	GO:0045892	0.0001161	0.078016	13	55	74	968	0.2364	0.0764	3.094	negative regulation of transcription, DNA-templated
complex social	faster	GO:1902679	0.0001161	0.078016	13	55	74	968	0.2364	0.0764	3.094	negative regulation of RNA biosynthetic process
complex social	faster	GO:1903507	0.0001161	0.078016	13	55	74	968	0.2364	0.0764	3.094	negative regulation of nucleic acid-templated transcription
complex social	faster	GO:0007422	0.00013206	0.0887476	6	55	16	968	0.1091	0.0165	6.612	peripheral nervous system development
complex social	faster	GO:0010605	0.00017236	0.115827	19	55	146	968	0.3455	0.1508	2.291	negative regulation of macromolecule metabolic process
complex social	faster	GO:0045168	0.00017408	0.116983	3	55	3	968	0.0545	0.0031	17.581	cell-cell signaling involved in cell fate commitment
complex social	faster	GO:0001752	0.00017589	0.118196	5	55	11	968	0.0909	0.0114	7.974	compound eye photoreceptor fate commitment
complex social	faster	GO:0046552	0.00017589	0.118196	5	55	11	968	0.0909	0.0114	7.974	photoreceptor cell fate commitment
complex social	faster	GO:0042706	0.00017589	0.118196	5	55	11	968	0.0909	0.0114	7.974	eye photoreceptor cell fate commitment
complex social	faster	GO:0009887	0.00019785	0.132954	16	55	111	968	0.2909	0.1147	2.536	animal organ morphogenesis
complex social	faster	GO:0010629	0.00022119	0.148642	16	55	112	968	0.2909	0.1157	2.514	negative regulation of gene expression
complex social	faster	GO:0120039	0.00024924	0.167487	12	55	69	968	0.2182	0.0713	3.06	plasma membrane bounded cell projection morphogenesis
complex social	faster	GO:0000904	0.00024924	0.167487	12	55	69	968	0.2182	0.0713	3.06	cell morphogenesis involved in differentiation
complex social	faster	GO:0048812	0.00024924	0.167487	12	55	69	968	0.2182	0.0713	3.06	neuron projection morphogenesis
complex social	faster	GO:0051172	0.00027561	0.185207	17	55	126	968	0.3091	0.1302	2.374	negative regulation of nitrogen compound metabolic process
complex social	faster	GO:0001751	0.00028194	0.189465	7	55	25	968	0.1273	0.0258	4.934	compound eye photoreceptor cell differentiation
complex social	faster	GO:0051253	0.00030671	0.206109	13	55	81	968	0.2364	0.0837	2.824	negative regulation of RNA metabolic process
complex social	faster	GO:0048858	0.00033144	0.222729	12	55	71	968	0.2182	0.0733	2.977	cell projection morphogenesis
complex social	faster	GO:0009790	0.00033155	0.222801	15	55	104	968	0.2727	0.1074	2.539	embryo development
complex social	faster	GO:0009892	0.00036428	0.244795	19	55	154	968	0.3455	0.1591	2.172	negative regulation of metabolic process
complex social	faster	GO:0032990	0.00038057	0.255742	12	55	72	968	0.2182	0.0744	2.933	cell part morphogenesis
complex social	faster	GO:0045934	0.00039593	0.266066	13	55	83	968	0.2364	0.0857	2.758	negative regulation of nucleobase-containing compound metabolic process
complex social	faster	GO:0022008	0.00039824	0.26762	19	55	155	968	0.3455	0.1601	2.158	neurogenesis
complex social	faster	GO:0005488	0.00043222	0.0363066	50	55	697	968	0.9091	0.72	1.263	binding
complex social	faster	GO:0042330	0.00044971	0.302207	10	55	53	968	0.1818	0.0548	3.318	taxis
complex social	faster	GO:0001754	0.00047622	0.32002	7	55	27	968	0.1273	0.0279	4.563	eye photoreceptor cell differentiation
complex social	faster	GO:0031324	0.00054633	0.367136	17	55	133	968	0.3091	0.1374	2.25	negative regulation of cellular metabolic process
complex social	faster	GO:0010558	0.00057112	0.383794	13	55	86	968	0.2364	0.0888	2.662	negative regulation of macromolecule biosynthetic process
complex social	faster	GO:2000113	0.00057112	0.383794	13	55	86	968	0.2364	0.0888	2.662	negative regulation of cellular macromolecule biosynthetic process
complex social	faster	GO:0120036	0.00061441	0.412884	14	55	98	968	0.2545	0.1012	2.515	plasma membrane bounded cell projection organization
complex social	faster	GO:0009888	0.00061478	0.413133	18	55	147	968	0.3273	0.1519	2.155	tissue development
complex social	faster	GO:0048699	0.00061478	0.413133	18	55	147	968	0.3273	0.1519	2.155	generation of neurons
complex social	faster	GO:0097014	0.00066819	0.0768413	3	55	4	968	0.0545	0.0041	13.293	ciliary plasm
complex social	faster	GO:0005930	0.00066819	0.0768413	3	55	4	968	0.0545	0.0041	13.293	axoneme
complex social	faster	GO:0009608	0.00066819	0.449021	3	55	4	968	0.0545	0.0041	13.293	response to symbiont
complex social	faster	GO:0030030	0.00068504	0.460348	14	55	99	968	0.2545	0.1023	2.488	cell projection organization
complex social	faster	GO:0048667	0.00069858	0.469449	11	55	66	968	0.2	0.0682	2.933	cell morphogenesis involved in neuron differentiation
complex social	faster	GO:0009890	0.00072154	0.484876	13	55	88	968	0.2364	0.0909	2.601	negative regulation of biosynthetic process
complex social	faster	GO:0031327	0.00072154	0.484876	13	55	88	968	0.2364	0.0909	2.601	negative regulation of cellular biosynthetic process
complex social	faster	GO:0007275	0.00072761	0.488956	32	55	356	968	0.5818	0.3678	1.582	multicellular organism development
complex social	faster	GO:0032501	0.00087434	0.58756	35	55	410	968	0.6364	0.4236	1.502	multicellular organismal process
complex social	faster	GO:0048859	0.00095255	0.640113	4	55	9	968	0.0727	0.0093	7.817	formation of anatomical boundary
complex social	faster	GO:0048513	0.0009693	0.651373	22	55	207	968	0.4	0.2138	1.871	animal organ development
complex social	faster	GO:0009605	0.00104141	0.699828	14	55	103	968	0.2545	0.1064	2.392	response to external stimulus
complex social	faster	GO:0031175	0.0013184	0.885967	12	55	82	968	0.2182	0.0847	2.576	neuron projection development
complex social	faster	GO:0007367	0.00152074	1	4	55	10	968	0.0727	0.0103	7.058	segment polarity determination
complex social	faster	GO:0016043	0.0016964	1	28	55	306	968	0.5091	0.3161	1.611	cellular component organization
complex social	faster	GO:0030154	0.00174537	1	25	55	260	968	0.4545	0.2686	1.692	cell differentiation
complex social	faster	GO:0007548	0.00175103	1	7	55	33	968	0.1273	0.0341	3.733	sex differentiation
complex social	faster	GO:0040011	0.00188339	1	13	55	97	968	0.2364	0.1002	2.359	locomotion
complex social	faster	GO:0046872	0.00196511	0.165069	23	55	232	968	0.4182	0.2397	1.745	metal ion binding
complex social	faster	GO:0043169	0.002093	0.175812	23	55	233	968	0.4182	0.2407	1.737	cation binding
complex social	faster	GO:0048856	0.00219571	1	32	55	376	968	0.5818	0.3884	1.498	anatomical structure development
complex social	faster	GO:0043296	0.00228922	0.263261	4	55	11	968	0.0727	0.0114	6.377	apical junction complex
complex social	faster	GO:0048869	0.00249618	1	25	55	266	968	0.4545	0.2748	1.654	cellular developmental process
complex social	faster	GO:0048731	0.00258084	1	26	55	282	968	0.4727	0.2913	1.623	system development
complex social	faster	GO:0000981	0.00262776	0.220732	9	55	55	968	0.1636	0.0568	2.88	RNA polymerase II transcription factor activity, sequence-specific DNA binding
complex social	faster	GO:0048666	0.00276239	1	13	55	101	968	0.2364	0.1043	2.267	neuron development
complex social	faster	GO:0007399	0.00298409	1	20	55	195	968	0.3636	0.2014	1.805	nervous system development
complex social	faster	GO:0003002	0.00305704	1	10	55	67	968	0.1818	0.0692	2.627	regionalization
complex social	faster	GO:0010160	0.00307712	1	3	55	6	968	0.0545	0.0062	8.79	formation of animal organ boundary
complex social	faster	GO:0071840	0.00311568	1	28	55	317	968	0.5091	0.3275	1.555	cellular component organization or biogenesis
complex social	faster	GO:0097485	0.00312464	1	8	55	46	968	0.1455	0.0475	3.063	neuron projection guidance
complex social	faster	GO:0048736	0.00312464	1	8	55	46	968	0.1455	0.0475	3.063	appendage development
complex social	faster	GO:0060288	0.00317289	1	2	55	2	968	0.0364	0.0021	17.333	formation of a compartment boundary
complex social	faster	GO:0007386	0.00317289	1	2	55	2	968	0.0364	0.0021	17.333	compartment pattern specification
complex social	faster	GO:0045465	0.00317289	1	2	55	2	968	0.0364	0.0021	17.333	R8 cell differentiation
complex social	faster	GO:0035203	0.00317289	1	2	55	2	968	0.0364	0.0021	17.333	regulation of lamellocyte differentiation
complex social	faster	GO:0030713	0.00317289	1	2	55	2	968	0.0364	0.0021	17.333	ovarian follicle cell stalk formation
complex social	faster	GO:0045613	0.00317289	1	2	55	2	968	0.0364	0.0021	17.333	regulation of plasmatocyte differentiation
complex social	faster	GO:0035153	0.00317289	1	2	55	2	968	0.0364	0.0021	17.333	epithelial cell type specification, open tracheal system
complex social	faster	GO:0008354	0.00317289	1	2	55	2	968	0.0364	0.0021	17.333	germ cell migration
complex social	faster	GO:0046331	0.00317289	1	2	55	2	968	0.0364	0.0021	17.333	lateral inhibition
complex social	faster	GO:0048580	0.00317289	1	2	55	2	968	0.0364	0.0021	17.333	regulation of post-embryonic development
complex social	faster	GO:0070723	0.00317289	1	2	55	2	968	0.0364	0.0021	17.333	response to cholesterol
complex social	faster	GO:0006357	0.00346055	1	16	55	142	968	0.2909	0.1467	1.983	regulation of transcription from RNA polymerase II promoter
complex social	faster	GO:0032502	0.00364465	1	32	55	386	968	0.5818	0.3988	1.459	developmental process
complex social	faster	GO:0048468	0.00367488	1	18	55	170	968	0.3273	0.1756	1.864	cell development
complex social	faster	GO:0009792	0.00413045	1	8	55	48	968	0.1455	0.0496	2.933	embryo development ending in birth or egg hatching
complex social	faster	GO:0006935	0.00413045	1	8	55	48	968	0.1455	0.0496	2.933	chemotaxis
complex social	faster	GO:0003007	0.00455223	1	4	55	13	968	0.0727	0.0134	5.425	heart morphogenesis
complex social	faster	GO:0007365	0.00455223	1	4	55	13	968	0.0727	0.0134	5.425	periodic partitioning
complex social	faster	GO:0046661	0.00455223	1	4	55	13	968	0.0727	0.0134	5.425	male sex differentiation
complex social	faster	GO:0009886	0.00471952	1	8	55	49	968	0.1455	0.0506	2.875	post-embryonic animal morphogenesis
complex social	faster	GO:0048707	0.00471952	1	8	55	49	968	0.1455	0.0506	2.875	instar larval or pupal morphogenesis
complex social	faster	GO:0007444	0.00487987	1	9	55	60	968	0.1636	0.062	2.639	imaginal disc development
complex social	faster	GO:2000027	0.00498957	1	5	55	21	968	0.0909	0.0217	4.189	regulation of organ morphogenesis
complex social	faster	GO:0003677	0.0050731	0.426141	19	55	189	968	0.3455	0.1952	1.77	DNA binding
complex social	faster	GO:0043565	0.00510762	0.42904	13	55	108	968	0.2364	0.1116	2.118	sequence-specific DNA binding
complex social	faster	GO:0036314	0.00516865	1	3	55	7	968	0.0545	0.0072	7.569	response to sterol
complex social	faster	GO:0007389	0.00528067	1	10	55	72	968	0.1818	0.0744	2.444	pattern specification process
complex social	faster	GO:0035295	0.0053283	1	12	55	96	968	0.2182	0.0992	2.2	tube development
complex social	faster	GO:0007552	0.00537162	1	8	55	50	968	0.1455	0.0517	2.814	metamorphosis
complex social	faster	GO:0048729	0.0054062	1	11	55	84	968	0.2	0.0868	2.304	tissue morphogenesis
complex social	faster	GO:0006928	0.00554675	1	13	55	109	968	0.2364	0.1126	2.099	movement of cell or subcellular component
complex social	faster	GO:0060541	0.00558528	1	7	55	40	968	0.1273	0.0413	3.082	respiratory system development
complex social	faster	GO:0007507	0.00622666	1	6	55	31	968	0.1091	0.032	3.409	heart development
complex social	faster	GO:0048608	0.00622666	1	6	55	31	968	0.1091	0.032	3.409	reproductive structure development
complex social	faster	GO:0007424	0.00622666	1	6	55	31	968	0.1091	0.032	3.409	open tracheal system development
complex social	faster	GO:0061458	0.00622666	1	6	55	31	968	0.1091	0.032	3.409	reproductive system development
complex social	faster	GO:0048737	0.00644033	1	7	55	41	968	0.1273	0.0424	3.002	imaginal disc-derived appendage development
complex social	faster	GO:0009791	0.00682635	1	9	55	63	968	0.1636	0.0651	2.513	post-embryonic development
complex social	faster	GO:0060429	0.00702567	1	14	55	125	968	0.2545	0.1291	1.971	epithelium development
complex social	faster	GO:0051704	0.00735605	1	15	55	139	968	0.2727	0.1436	1.899	multi-organism process
complex social	faster	GO:0007350	0.00857053	1	6	55	33	968	0.1091	0.0341	3.199	blastoderm segmentation
complex social	faster	GO:0010647	0.00862769	1	10	55	77	968	0.1818	0.0795	2.287	positive regulation of cell communication
complex social	faster	GO:0023056	0.00862769	1	10	55	77	968	0.1818	0.0795	2.287	positive regulation of signaling
complex social	faster	GO:0097065	0.0091705	1	2	55	3	968	0.0364	0.0031	11.742	anterior head development
complex social	faster	GO:0031514	0.0091705	1	2	55	3	968	0.0364	0.0031	11.742	motile cilium
complex social	faster	GO:0035288	0.0091705	1	2	55	3	968	0.0364	0.0031	11.742	anterior head segmentation
complex social	faster	GO:0060914	0.0091705	1	2	55	3	968	0.0364	0.0031	11.742	heart formation
complex social	faster	GO:0048701	0.0091705	1	2	55	3	968	0.0364	0.0031	11.742	embryonic cranial skeleton morphogenesis
complex social	faster	GO:0060571	0.0091705	1	2	55	3	968	0.0364	0.0031	11.742	morphogenesis of an epithelial fold
complex social	faster	GO:0035107	0.00959834	1	7	55	44	968	0.1273	0.0455	2.798	appendage morphogenesis
complex social	faster	GO:0007411	0.00959834	1	7	55	44	968	0.1273	0.0455	2.798	axon guidance
complex social	faster	GO:0007409	0.00973065	1	8	55	55	968	0.1455	0.0568	2.562	axonogenesis
complex social	faster	GO:0002165	0.00973065	1	8	55	55	968	0.1455	0.0568	2.562	instar larval or pupal development
complex social	slower	GO:0044798	0.0017589	0.38344	7	141	14	962	0.0496	0.0146	3.397	nuclear transcription factor complex
complex social	slower	GO:0019888	0.00244398	0.518125	5	141	8	962	0.0355	0.0083	4.277	protein phosphatase regulator activity
complex social	slower	GO:0031090	0.00260784	0.568509	30	141	127	962	0.2128	0.132	1.612	organelle membrane
complex social	slower	GO:0043234	0.00268049	0.584347	37	141	167	962	0.2624	0.1736	1.512	protein complex
complex social	slower	GO:0032991	0.00289215	0.630489	57	141	289	962	0.4043	0.3004	1.346	macromolecular complex
complex social	slower	GO:0015932	0.00309166	0.655433	3	141	3	962	0.0213	0.0031	6.871	nucleobase-containing compound transmembrane transporter activity
complex social	slower	GO:1901505	0.00309166	0.655433	3	141	3	962	0.0213	0.0031	6.871	carbohydrate derivative transmembrane transporter activity
complex social	slower	GO:0005689	0.00309166	0.673983	3	141	3	962	0.0213	0.0031	6.871	U12-type spliceosomal complex
complex social	slower	GO:0098586	0.00309166	1	3	141	3	962	0.0213	0.0031	6.871	cellular response to virus
complex social	slower	GO:0098588	0.00315299	0.687351	22	141	85	962	0.156	0.0884	1.765	bounding membrane of organelle
complex social	slower	GO:0019208	0.00485377	1	5	141	9	962	0.0355	0.0094	3.777	phosphatase regulator activity
complex social	slower	GO:0006325	0.00603679	1	14	141	48	962	0.0993	0.0499	1.99	chromatin organization
complex social	slower	GO:0090575	0.00632695	1	6	141	13	962	0.0426	0.0135	3.156	RNA polymerase II transcription factor complex
complex social	slower	GO:0044446	0.00841658	1	76	141	426	962	0.539	0.4428	1.217	intracellular organelle part
complex social	slower	GO:0046620	0.00857238	1	5	141	10	962	0.0355	0.0104	3.413	regulation of organ growth
complex social	slower	GO:0003714	0.00857238	1	5	141	10	962	0.0355	0.0104	3.413	transcription corepressor activity
complex social	slower	GO:0007283	0.00910915	1	8	141	22	962	0.0567	0.0229	2.476	spermatogenesis
complex social	slower	GO:0044422	0.00992395	1	77	141	435	962	0.5461	0.4522	1.208	organelle part
all social	faster	GO:0048872	0.00031501	0.199086	4	50	8	1016	0.08	0.0079	10.127	homeostasis of number of cells
all social	faster	GO:0015216	0.00237578	0.230451	2	50	2	1016	0.04	0.002	20	purine nucleotide transmembrane transporter activity
all social	faster	GO:0000295	0.00237578	0.230451	2	50	2	1016	0.04	0.002	20	adenine nucleotide transmembrane transporter activity
all social	faster	GO:0005346	0.00237578	0.230451	2	50	2	1016	0.04	0.002	20	purine ribonucleotide transmembrane transporter activity
all social	faster	GO:0005347	0.00237578	0.230451	2	50	2	1016	0.04	0.002	20	ATP transmembrane transporter activity
all social	faster	GO:0015605	0.00237578	0.230451	2	50	2	1016	0.04	0.002	20	organophosphate ester transmembrane transporter activity
all social	faster	GO:0015215	0.00237578	0.230451	2	50	2	1016	0.04	0.002	20	nucleotide transmembrane transporter activity
all social	faster	GO:0042478	0.00237578	1	2	50	2	1016	0.04	0.002	20	regulation of eye photoreceptor cell development
all social	faster	GO:0035153	0.00237578	1	2	50	2	1016	0.04	0.002	20	epithelial cell type specification, open tracheal system
all social	faster	GO:0035155	0.00237578	1	2	50	2	1016	0.04	0.002	20	negative regulation of terminal cell fate specification, open tracheal system
all social	faster	GO:0021587	0.00237578	1	2	50	2	1016	0.04	0.002	20	cerebellum morphogenesis
all social	faster	GO:0045314	0.00237578	1	2	50	2	1016	0.04	0.002	20	regulation of compound eye photoreceptor development
all social	faster	GO:0021575	0.00237578	1	2	50	2	1016	0.04	0.002	20	hindbrain morphogenesis
all social	faster	GO:0043010	0.00361125	1	4	50	14	1016	0.08	0.0138	5.797	camera-type eye development
all social	faster	GO:0006366	0.00404954	1	5	50	23	1016	0.1	0.0226	4.425	transcription from RNA polymerase II promoter
all social	faster	GO:0030139	0.00474686	0.460445	4	50	15	1016	0.08	0.0148	5.405	endocytic vesicle
all social	faster	GO:0045787	0.00492673	1	5	50	24	1016	0.1	0.0236	4.237	positive regulation of cell cycle
all social	faster	GO:0007423	0.00621586	1	10	50	85	1016	0.2	0.0837	2.389	sensory organ development
all social	faster	GO:1902531	0.00676986	1	10	50	86	1016	0.2	0.0846	2.364	regulation of intracellular signal transduction
all social	faster	GO:0015932	0.00690242	0.669534	2	50	3	1016	0.04	0.003	13.333	nucleobase-containing compound transmembrane transporter activity
all social	faster	GO:1901505	0.00690242	0.669534	2	50	3	1016	0.04	0.003	13.333	carbohydrate derivative transmembrane transporter activity
all social	faster	GO:0046580	0.00690242	1	2	50	3	1016	0.04	0.003	13.333	negative regulation of Ras protein signal transduction
all social	faster	GO:1902808	0.00690242	1	2	50	3	1016	0.04	0.003	13.333	positive regulation of cell cycle G1/S phase transition
all social	faster	GO:1905953	0.00690242	1	2	50	3	1016	0.04	0.003	13.333	negative regulation of lipid localization
all social	faster	GO:0030099	0.00690242	1	2	50	3	1016	0.04	0.003	13.333	myeloid cell differentiation
all social	faster	GO:0051058	0.00690242	1	2	50	3	1016	0.04	0.003	13.333	negative regulation of small GTPase mediated signal transduction
all social	faster	GO:0021549	0.00690242	1	2	50	3	1016	0.04	0.003	13.333	cerebellum development
all social	faster	GO:0036335	0.00690242	1	2	50	3	1016	0.04	0.003	13.333	intestinal stem cell homeostasis
all social	faster	GO:1900087	0.00690242	1	2	50	3	1016	0.04	0.003	13.333	positive regulation of G1/S transition of mitotic cell cycle
all social	faster	GO:0009996	0.00690242	1	2	50	3	1016	0.04	0.003	13.333	negative regulation of cell fate specification
all social	faster	GO:0042067	0.0076452	1	3	50	9	1016	0.06	0.0089	6.742	establishment of ommatidial planar polarity
all social	faster	GO:0010648	0.00769537	1	9	50	74	1016	0.18	0.0728	2.473	negative regulation of cell communication
all social	faster	GO:0023057	0.00769537	1	9	50	74	1016	0.18	0.0728	2.473	negative regulation of signaling
all social	faster	GO:0090068	0.00953325	1	4	50	18	1016	0.08	0.0177	4.52	positive regulation of cell cycle process
all social	faster	GO:0048568	0.00980527	1	5	50	28	1016	0.1	0.0276	3.623	embryonic organ development
all social	faster	GO:0090596	0.00993878	1	7	50	51	1016	0.14	0.0502	2.789	sensory organ morphogenesis
all social	slower	GO:0030128	0.0020192	0.240285	2	46	2	1013	0.0435	0.002	21.75	clathrin coat of endocytic vesicle
all social	slower	GO:0045334	0.0020192	0.240285	2	46	2	1013	0.0435	0.002	21.75	clathrin-coated endocytic vesicle
all social	slower	GO:0030669	0.0020192	0.240285	2	46	2	1013	0.0435	0.002	21.75	clathrin-coated endocytic vesicle membrane
all social	slower	GO:0021872	0.0020192	1	2	46	2	1013	0.0435	0.002	21.75	forebrain generation of neurons
all social	slower	GO:0021879	0.0020192	1	2	46	2	1013	0.0435	0.002	21.75	forebrain neuron differentiation
all social	slower	GO:0006517	0.0020192	1	2	46	2	1013	0.0435	0.002	21.75	protein deglycosylation
all social	slower	GO:0021884	0.0020192	1	2	46	2	1013	0.0435	0.002	21.75	forebrain neuron development
all social	slower	GO:0016204	0.0020192	1	2	46	2	1013	0.0435	0.002	21.75	determination of muscle attachment site
all social	slower	GO:0031333	0.00418609	1	3	46	8	1013	0.0652	0.0079	8.253	negative regulation of protein complex assembly
all social	slower	GO:0030323	0.00418609	1	3	46	8	1013	0.0652	0.0079	8.253	respiratory tube development
all social	slower	GO:0030324	0.00418609	1	3	46	8	1013	0.0652	0.0079	8.253	lung development
all social	slower	GO:0007267	0.00564655	1	8	46	63	1013	0.1739	0.0622	2.796	cell-cell signaling
all social	slower	GO:0030120	0.00588186	0.699941	2	46	3	1013	0.0435	0.003	14.5	vesicle coat
all social	slower	GO:0030125	0.00588186	0.699941	2	46	3	1013	0.0435	0.003	14.5	clathrin vesicle coat
all social	slower	GO:0031901	0.00588186	0.699941	2	46	3	1013	0.0435	0.003	14.5	early endosome membrane
all social	slower	GO:0030665	0.00588186	0.699941	2	46	3	1013	0.0435	0.003	14.5	clathrin-coated vesicle membrane
all social	slower	GO:0044450	0.0060801	0.723532	3	46	9	1013	0.0652	0.0089	7.326	microtubule organizing center part
all social	slower	GO:0060322	0.0063283	1	7	46	51	1013	0.1522	0.0503	3.026	head development
all social	slower	GO:0044087	0.0068632	1	8	46	65	1013	0.1739	0.0642	2.709	regulation of cellular component biogenesis

## Sheet: TableS10
Table S10. Genes involved in neuron differentiation proximal NCARs evolving faster in taxa with complex sociality.
OrthoGroup	A. mellifera gene	OrthoDB Drosophila ortholog	Drosophila gene name	NCAR sequence feature and RER result	Motifs gained or lost
1770	GB49657	FBgn0004606	zfh1	1 intron (first) faster	gains
1993	GB45709	FBgn0261837,FBgn0002781,FBgn0029822	mod(mdg4),CG12236	1 intron (last) faster	none
2992	GB45518	FBgn0011259,FBgn0264273,FBgn0016059,FBgn0011260	Sema1a,Sema1b,Sema1b, Sema2b	1 intron (first) faster	none
4597	GB54774	FBgn0000117	arm	2 upstream faster	gains
4683	GB49149	FBgn0031879,FBgn0004647	N	1 intron (first) faster	none
4997	GB45459	FBgn0003716,FBgn0011300,FBgn0003317	babo/sax/tkv	1 downstream faster	gains
5050	GB42304	FBgn0001319	kn	1 intron (third) faster	none
5554	GB48655	FBgn0001235	hth	1 intron (second) faster	none
7270	GB43638	FBgn0004638	drk	1 3’UTR faster, 1 3’UTR slower	gains
7670	GB54569	None		1 downstream faster	gains
8017	GB55036	FBgn0039683,FBgn0000504,FBgn0038851,FBgn0030477	dsx	1 intron (third) faster	losses
8584	GB47319	FBgn0005771,FBgn0004858	elB	4 intron (first) faster	gains & losses
9281	GB55715	FBgn0004198	ct	2 introns (third) faster	none
9282	GB55714	FBgn0003545	sub	1 downstream faster	gains
11121	GB48486	FBgn0051632,FBgn0002573	sens	1 intron (first) faster	losses
11145	GB55066	FBgn0004644	hh	1 intron (first) faster	gains
11293	GB40150	FBgn0262477	FoxP	2 introns (first) faster	losses
13851	GB50376	FBgn0265487	mbl	1 intron (first) faster	losses

[truncated: 9 more sheets: TableS11, TableS12, TableS13, TableS14, TableS15, TableS16, TableS17, TableS18, TableS19]
